1 **Sexual selection for rare beneficial mutations promotes the evolution of sexual**  
2 **reproduction and adaptation**

3

4 **Gilbert Roberts\* and Marion Petrie<sup>†</sup>**

5

6 \* Simonside Cottage, Morpeth, Northumberland, NE65 8RW, UK

7 Author for correspondence: gilbert.roberts@yahoo.co.uk

8

9 <sup>†</sup> Newcastle University, Campus for Ageing and Vitality, Newcastle upon Tyne, NE4 5PL, UK

10

11 **Abstract**

12

13 The evolution and widespread maintenance of sexual reproduction remains a conundrum in  
14 biology because asexual reproduction should allow twice the reproductive rate. One  
15 hypothesis is that sexual selection lessens the negative impact on fitness of accumulating  
16 deleterious mutations. However, for adaptation to occur, there must also be selection for  
17 beneficial mutations. Here we show that sexual selection can help explain the evolution and  
18 maintenance of sexual reproduction. In our model, females chose males with more beneficial  
19 mutations (as opposed to just fewer harmful ones) even when these occurred much more  
20 rarely. Sexual selection thereby increased fixation of beneficial mutations which increased  
21 the absolute genetic quality of sexual offspring. This increase in fitness relative to asexual  
22 offspring adds to the previously postulated effect of reduced mutation load in offsetting the  
23 cost of sex. Analysing our simulations reveals that female choice among males raised the  
24 fitness of reproducing males above that of females. We found that this effect could overcome  
25 the decline in average fitness that occurs when mutation rate increases, allowing an  
26 increase in the fixation of beneficial mutations. Sexual selection thereby not only facilitates  
27 the evolution of sexual reproduction but maintains sex by leveraging its benefits and driving  
28 adaptation.

## 29 **Introduction**

30

31 Any explanation for the evolution of sexual reproduction within groups must show how the  
32 production of males, even when they do not care for offspring, increases the fitness of  
33 sexually produced offspring, otherwise there is a 'two-fold cost of sex' [1, 2]. Sexual  
34 reproduction entails variance in mating success, especially where females can choose  
35 between males of varying quality and where a male can mate with more than one female [3,  
36 4]. This differential mating success is integral to the process of sexual selection, which could  
37 theoretically contribute to the maintenance of sex by the selective removal of low quality  
38 males that effectively act as a sink for mutation load [5, 6]. Sexual selection could thereby  
39 reduce the risk of population extinction [7], as has been demonstrated in flour beetles  
40 *Tribolium castaneum* [8]. According to this theory, males become 'useful' in that females can  
41 pick those males with the lowest load of deleterious mutations.

42

43 Mutation is the source of variation and the overwhelming majority of mutations are  
44 deleterious [9] to the extent that models have ignored beneficial mutations, deeming them  
45 too rare to be of interest. Nevertheless, adaptation depends upon those rare occasions when  
46 mutations have a beneficial impact on fitness. Here, we investigate the role of sexual  
47 selection in favouring beneficial mutations. Sexual selection can be a powerful process  
48 resulting in strongly biased mating success [10]. This can even allow modifiers of the  
49 mutation rate ('mutator genes', such as factors controlling DNA repair [11, 12]) to persist,  
50 because female choice selects for those males with beneficial mutations [13, 14]. We  
51 postulate here that female choice can be so potent that it not only promotes the maintenance  
52 of genetic variation, but it allows beneficial mutations, despite their comparative rarity, to  
53 have a significant impact on fitness. This means that the two-fold cost of sex may be  
54 overcome not just by the lower reduction in fitness caused by deleterious mutation load [5,  
55 6], but by the increase in fitness resulting from fixation of new beneficial mutations. We  
56 further postulate that female choice can favour an increase in mutation rate, despite the  
57 decline expected from the predominance of deleterious mutations, because female choice is  
58 effective in selecting for those with an increased number of beneficial mutations.

59

60 We simulated the 'genetic quality' of individuals by examining the evolution of deleterious  
61 and beneficial mutations in asexual and in sexual populations, and by varying the degree of  
62 female choice in the latter. Implicit in our model is the assumption that, in addition to  
63 determining survival, the mutations that a male accumulates determine the condition of  
64 some trait, which is used by female subjects in mate choice. Thus, we assume that a male's  
65 genetic quality is revealed in the trait and the female subjects use that information to select

66 the best male. This assumption is supported by the literature on ‘good genes’ effects in  
67 sexual selection [15, 16] and by the demonstration that sexual traits can reveal genetic  
68 quality [17, 18]. It is also consistent with other sexual selection models [19]. We compared  
69 sexual and asexual populations in the presence of varying levels of sexual selection and a  
70 modifier of mutation rate. We hypothesized that increasing mutation rate above a baseline  
71 would leverage the effects of sexual selection making it more likely for sexual types to have  
72 higher genetic quality than asexual types. The rationale for this is that an increase in  
73 mutation rate feeds variation in genetic quality (and hence attractiveness), and that this  
74 variation promotes choice between males [4]. We consider that sexually reproducing  
75 individuals will vary in mating success [5] and that a key driver of this variation is female  
76 choice for high quality and attractive mates that will provide females with high viability and  
77 attractive offspring. We propose that females can actually get ‘good genes’ rather than  
78 ‘fewer bad genes’ as in the models of how sexual selection facilitates the evolution of sex [5,  
79 6]. As such, we predicted that variability in mutation rate should facilitate the effect of sexual  
80 selection in overcoming the two-fold cost of sex.

81

## 82 **Results**

83

84 Looking at deleterious mutations first, we found that in populations with asexual reproduction  
85 and in those with sexual reproduction but no sexual selection, deleterious mutation load  
86 increased dramatically when mutation rate increased (Figure 1a). However, female choice,  
87 even between just two males, reduced deleterious mutations to very low levels. Female  
88 choice was so effective that even with a high mutation rate, the numbers of deleterious  
89 mutations were reduced to substantially below those found in asexual populations or in  
90 sexual populations lacking female choice. Conversely, numbers of beneficial mutations were  
91 low, even with a ten-fold increase in mutation rate in asexual populations and sexual ones  
92 without female choice (Figure 1b). However, with female choice, beneficial mutations were  
93 much more common, and increased mutation rate accentuated this effect. Summing these  
94 effects, overall genetic quality decreased with increasing mutation rate in asexual  
95 populations and sexual ones lacking female choice, yet it increased with increasing mutation  
96 rate in populations with female choice (Figure 1c). Thus, sexual selection was so powerful  
97 that it overcame the 1000-fold disadvantage of the beneficial mutation rate and allowed an  
98 increase in genetic quality with increased mutation rate. This increase in genetic quality  
99 occurred because sexual selection was effective at keeping numbers of deleterious  
100 mutations low despite an increase in mutation rate, yet was also effective in selecting for  
101 beneficial mutations, and could do this most effectively when mutation rate was high.

102

103 **Figure 1**

104 **a**

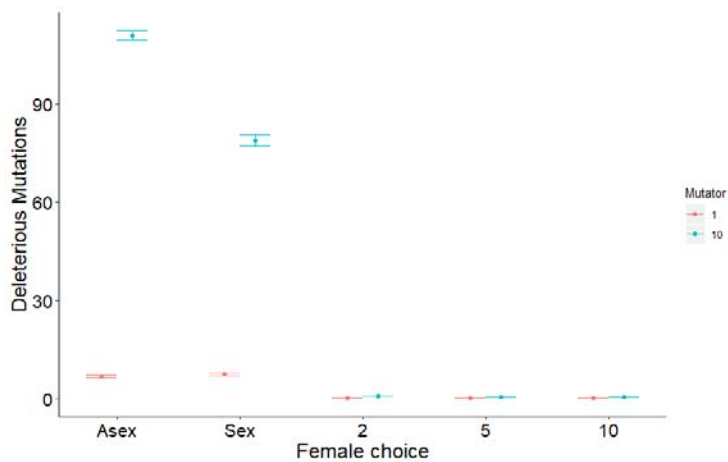

105

106 **b**

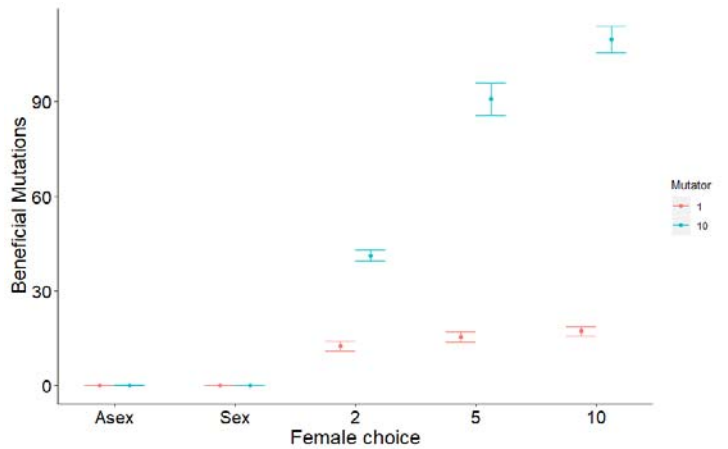

107

108 **c**

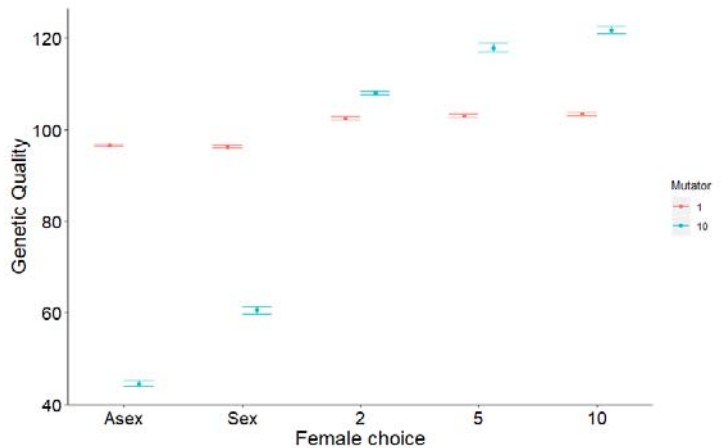

109

110

111 **Figure 1 Legend**

112

113 The figure shows how the numbers of mutations per individual vary with mode of  
114 reproduction and strength of female choice where “Asex” is asexual reproduction; “Sex” is  
115 sexual reproduction without female choice; and where “2”, “5” and “10” are sexual  
116 reproduction with female choice between the given number of males . Figures a and b show  
117 the numbers of mutations per individual; c shows ‘genetic quality’ calculated as baseline  
118 fitness (100) minus the number of deleterious mutations per individual multiplied by the  
119 effect of each (0.5); plus the number of beneficial mutations multiplied by the effect of each  
120 (0.2). The rate of deleterious mutations per gene per individual per generation was 1000x  
121 that of beneficial mutations. Plotted are the means and standard errors computed across 10  
122 simulations for each set of parameters, taken at generation 1000. Plotted in red are the  
123 results where the mutator gene  $M = 1$ ; blue is where  $M = 10$ , i.e. the rates of both deleterious  
124 and beneficial mutations are at 10x the baseline mutation rates, which were  $10^{-3}$  and  $10^{-6}$   
125 respectively. Other parameters: population size  $N=1000$ , equally divided between males and  
126 females in simulations with sexual reproduction; cost of female choice =  $0.02 \times$  female choice.  
127  
128

129 We further investigated the interaction between female choice and mutation rate (Figure 2).  
130 Genetic quality increased with mutation rate and female choice to an intermediate maximum  
131 before declining rapidly. High levels of female choice improved genetic quality; but there  
132 came a point where even the highest level of female choice shown was insufficiently  
133 powerful not to be overwhelmed by the surge in deleterious mutations caused by a  
134 substantially increased mutation rate.

135

136 **Figure 2.**

137

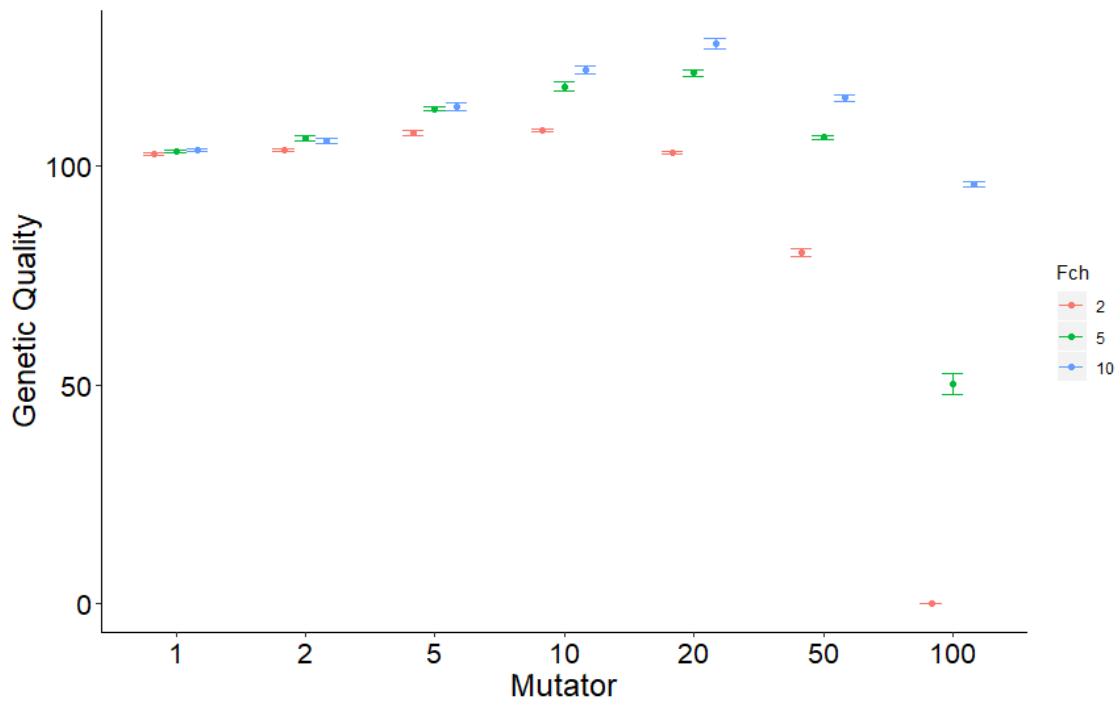

138

139 **Figure 2 Legend.**

140 The figure shows how 'genetic quality' varies with a 'Mutator' and with sexual selection by  
141 female choice. Genetic quality was calculated as given in Fig. 1. The mutator was a  
142 multiplier of the default mutation rates. Female choice was between 2, 5 and 10 males.  
143 Plotted are the means and standard errors computed across 10 simulations for each set of  
144 parameters, taken at generation 1000. Other parameters were as in Fig. 1.

145

146

147 We investigated the robustness of our results by varying key parameters whilst maintaining a  
148 moderate degree of female choice ( $F = 5$ ). First, we varied the ratio of deleterious to  
149 beneficial mutation around the default ratio of 1000:1 respectively. As intuitively expected,  
150 genetic quality increased as beneficial mutations became relatively more common, and  
151 especially when this factor combined with a higher mutation rate (Figure S1). Looking at the  
152 effect on genetic quality of each beneficial mutation, we can again see that the results are  
153 intuitive (Figure S2): increasing the effect of beneficial mutations increases genetic quality,  
154 especially when mutation rate is high. Varying the cost of female choice within the range  
155 shown has no effect on genetic quality in either mutation rate condition (Figure S3).  
156 Increasing the population size,  $P$ , increased the effect size, as expected from the increased  
157 potential for genetic change across more individuals (Figure S4). Varying recombination rate  
158 had a little quantitative effect, with increased recombination allowing an increase in genetic  
159 quality, presumably through allowing favourable genetic combinations (Figure S5). All in all,  
160 varying key parameters suggested that the main effect we describe was robust.

161

162 The benefit of simulations is that they can help us predict processes that are difficult to  
163 comprehend intuitively or mathematically; the corollary is that they can be hard to interpret.  
164 To better understand the processes in the model we hypothesized that female choice selects  
165 for a breeding population that results in offspring that are  $s$  standard deviations above the  
166 mean of the underlying population. To test whether males that were chosen to breed were  
167 indeed of higher genetic quality than the population from which they were drawn, we  
168 aggregated across the first 1000 generations for all 1000 reproducing pairs and calculated  
169 the mean difference in genetic quality between females and their chosen males. Where  
170 female choice was absent and mutation was at the default rate, the mean difference was  
171  $0.01 \pm <0.005$  (standard error of the mean); with females choosing the best of 10 males and  
172 mutation rate at 10x the default, the difference was  $0.22 \pm <0.005$ . Therefore, females were  
173 choosing males that had a genetic quality equivalent to approximately 1 beneficial mutation  
174 above the average (recall that we modelled only a few genes, not the entire genome). In this  
175 way, sexual selection appears to be able to exploit increasing variation caused by increased  
176 mutation rate and actually produce an increase in genetic quality out of a background that  
177 one would otherwise expect to be dominated by increased deleterious mutation load.

178

179 As a simple analytical approximation, consider that female choice between males results in  
180 offspring that are  $s$  standard deviations above the mean. For the cost of sex to be overcome  
181 we then need:

$$\bar{x} + s\sigma > 2\bar{x}$$

$$s > \frac{\bar{x}}{\sigma}$$

182

Equation 1

183

184 This equation will most readily be satisfied when the standard deviation of the genetic quality  
185 is high relative to the mean. That is, there should be high variability within the population.

186 Variability results from mutation, and we can show when an increase in mutation rate can be

187 favoured. This can occur when the decrease in the mean genetic quality in the population

188 that necessarily results from an increase in mutation rate (assuming there is a strong

189 predominance of deleterious over beneficial mutations) is more than compensated for by the

190 effect of female choice in selecting for males of high genetic quality. If subscripts 1 and 2

191 indicate the means and standard deviations before and after the change in mutation rate,

192 then:

$$\bar{x}_2 + s\sigma_2 > \bar{x}_1 + s\sigma_1$$

193

$$s > \frac{\bar{x}_1 - \bar{x}_2}{\sigma_2 - \sigma_1}$$

194

Equation 2

195

196 This analytical approach has the benefit that it considers the whole genome, something we

197 do not attempt in our simulations, which allow us to include stochastic factors at the level of

198 the gene. As a hypothetical numerical example, consider that increasing the mutation rate

199 lowers the mean genetic quality from 1 to 0.9 whilst increasing the variance in genetic quality

200 from 0.2 to 0.4. Consider also that female choice selects for males that produce offspring 1

201 standard deviation above the mean. Entering these hypothetical values into Equation 2

202 demonstrates that an increase in mutation rate combined with female choice can indeed

203 lead to an increase in the genetic quality of offspring. To aid understanding, this example is

204 illustrated in Figure S6. Whilst simplified, this makes the point that an increase in mutation

205 rate can be favoured under sexual selection and can thereby contribute to overcoming the

206 two-fold cost of sex.

207

## 208 **Discussion**

209

210 We have shown here that an increase in mutation rate works with sexual selection to

211 increase genetic quality and thereby assist in overcoming the two-fold cost of sex. Crucially,

212 our simulations reveal that sexual selection not only leads to the maintenance of variation

213 [13, 20], but also leads to an adaptive increase in genetic quality. This is counterintuitive



214 given that any increase in mutation rate brings 1000 times as many deleterious as beneficial  
215 mutations in our model. This result highlights just how powerful the effect of female choice  
216 can be, even when just choosing between 2 males. We believe this is the first time that this  
217 effect has been reported. Its significance is that if mutation rate is elevated above a typically  
218 postulated minimum level then this would increase the benefits of sex relative to asexual  
219 reproduction, helping to overcome what has been termed the ‘two-fold cost of sex’ [1, 2]. It  
220 therefore seems that the role of sexual selection in the promotion of heritable genetic  
221 variation is key to understanding the evolution of sexual reproduction.

222

223 Our model assumes that mutation can be controlled genetically. One mechanism for this is  
224 through selection on those genes that are responsible for DNA repair [11]. We predict a  
225 greater mutation rate in genes that influence sexually selected phenotypes and in more  
226 sexually selected species. Across non-human species, particularly in birds, which differ in  
227 within population variance in mating success [21], and thus the level of sexual selection,  
228 there is some evidence of a positive correlation with the rate of mutation, measured by  
229 variance in minisatellite mutation rate [22, 23]. Given that sexual selection can often result in  
230 greater variance in mating success in males, our results are also consistent with male-  
231 biased mutation rates [24]. Our results may also be consistent with the finding that sexual  
232 selection interacts with mutation rates in seed beetles [25].

233

234 Our model reveals a positive feedback effect whereby a high mutation rate can favour sexual  
235 reproduction over asexual reproduction, while sexual reproduction with sexual selection can  
236 favour a high mutation rate. We speculate that this creates a ratchet effect in that once  
237 sexual reproduction is established, it becomes harder to switch back to asexual  
238 reproduction. Paradoxically, natural selection will tend to favour a low mutation rate [9], yet  
239 adaptation requires mutation. Our model shows how a faster rate of adaptation can occur  
240 with sexual selection. This is consistent with the finding that sexual selection (measured as  
241 the degree of polygyny) interacts with the rate of molecular evolution and with body mass to  
242 predict species richness at the genus level [26]. We argue that evolvability itself is under  
243 selection [27], and that through sexual reproduction with sexual selection, evolution can lead  
244 to greater evolvability.

245

246

247 **Methods**

248

249 We simulated the ‘genetic quality’ of individuals by examining the evolution of deleterious  
250 and beneficial mutations in asexual and in sexual populations, and by varying the degree of  
251 female choice in the latter. A simplified flow diagram of the simulations is given in Figure S6  
252 and a Visual C program is provided as supplementary information. Our simulation methods  
253 were based on models of the evolution of mutation rate [11, 13]. As in those simulations, the  
254 parameters reflected literature estimates where available [28], subject to the constraint that  
255 the model was intended as a simple abstraction of reality and not an attempt to simulate an  
256 entire genome.

257

258 The simulations began by setting up a population of  $P$  individuals. In simulations of sexual  
259 populations, half were male and half female. Individuals were given a pair of homologous  
260 ‘chromosomes’ (i.e., we assumed diploidy) each bearing a ‘mutator gene’ and an associated  
261 string of 10 ‘viability genes’. We did not assume that these genes constituted the entire  
262 genome; only that there were no interactions between the genes of interest and those at  
263 other sites and that for the purposes of comparison between simulations, all other things  
264 were equal.

265

266 Each viability gene was subjected to a mutation process in which the rates of deleterious  
267 and beneficial mutations varied between simulations. The absolute rates of mutation were  
268 determined by the mutator gene, which increased the rates of beneficial and of deleterious  
269 mutation by a factor  $M$ . We assumed that the mutator gene affected DNA repair only in a  
270 relatively small region of the genome [29], namely the set of viability genes referred to  
271 above; that it was adjacent to the first of the row of viability genes; and that the crossover  
272 rate between the mutator and the first viability gene was the same as between each other  
273 viability gene.

274

275 Individuals were subjected to a mortality process, whereby their probability of survival was a  
276 function of their genetic quality. Deleterious mutations were assumed to have larger  
277 phenotypic effects than beneficial mutations: deleterious mutations reduced the wild type  
278 fitness of 100 by 0.5; beneficial mutations increased it by 0.2. The model assumed co-  
279 dominance with additive fitness effects, so the effects of mutations were summed to give  
280 ‘genetic qualities’, which determined individual survivorship in a mortality process.

281

282 Surviving individuals reproduced, either by asexual or by sexual reproduction, the latter with  
283 or without female choice. Asexual reproduction was by selecting an individual at random and

284 copying its chromosomes into an individual in the next generation. Sexual reproduction  
285 without female choice involved selecting a male and a female subject at random. In the case  
286 of female choice, a female subject was selected at random, and a set of  $F$  male subjects  
287 was selected at random. The female then bred with the male of highest genetic quality from  
288 that set of  $F$  males. This ‘best of  $n$ ’ rule is the most widely used rule in modelling female  
289 choice [30, 31] and has some empirical support from lekking species [32]. For each sexual  
290 mating, one offspring was produced by bringing together chromosomes contributed by both  
291 parents. This was carried out by selecting a chromosome at random from each parent and  
292 allowing crossover between each adjacent gene with probability 0.01. The process of  
293 selecting parents and producing offspring was repeated until the population was replaced by  
294 a new generation of  $P$  individuals.

295

296 Unless otherwise stated, parameters used were as given in Table S1.

297

298 **Author contributions:** GR devised the computer simulations and analysis and wrote the  
299 paper. MP conceived the original idea of relating sexual selection and mutation rate, and  
300 contributed to the theoretical background.

301

302 **Acknowledgements:** [none]

303

## 304 **References**

305

- 306 1. Lehtonen, J., M.D. Jennions, and H. Kokko, *The many costs of sex*. Trends in  
307 Ecology & Evolution, 2012. **27**(3): p. 172-178.
- 308 2. Maynard Smith, J., *What use is sex?* Journal of Theoretical Biology, 1971. **30**(2): p.  
309 319-335.
- 310 3. Trivers, R.L., *Parental investment and sexual selection*, in *Sexual selection and the*  
311 *descent of man 1871-1971*, B. Campbell, Editor. 1972, Aldone: Chicago. p. 136-179.
- 312 4. Petrie, M. and M. Lipsitch, *Avian polygyny is most likely in populations with high*  
313 *variability in heritable male fitness*. Proceedings of the Royal Society of London.  
314 Series B: Biological Sciences, 1994. **256**(1347): p. 275-280.
- 315 5. Agrawal, A.F., *Sexual selection and the maintenance of sexual reproduction*. Nature,  
316 2001. **411**(6838): p. 692-695.
- 317 6. Siller, S., *Sexual selection and the maintenance of sex*. Nature, 2001. **411**(6838): p.  
318 689-692.
- 319 7. Whitlock, M.C., *Fixation of new alleles and the extinction of small populations: drift*  
320 *load, beneficial alleles, and sexual selection*. Evolution, 2000. **54**(6): p. 1855-1861.

- 321 8. Lumley, A.J., et al., *Sexual selection protects against extinction*. Nature, 2015.  
322 **522**(7557): p. 470-473.
- 323 9. Charlesworth, D., N.H. Barton, and B. Charlesworth, *The sources of adaptive*  
324 *variation*. Proceedings of the Royal Society B: Biological Sciences, 2017. **284**(1855):  
325 p. 20162864.
- 326 10. Clutton-Brock, T., *Reproductive competition and sexual selection*. Philosophical  
327 Transactions of the Royal Society B: Biological Sciences, 2017. **372**(1729): p.  
328 20160310.
- 329 11. Taddei, F., et al., *Role of mutator alleles in adaptive evolution*. Nature, 1997.  
330 **387**(6634): p. 700-702.
- 331 12. Agrawal, A.F. and A.D. Wang, *Increased Transmission of Mutations by Low-*  
332 *Condition Females: Evidence for Condition-Dependent DNA Repair*. PLOS Biology,  
333 2008. **6**(2): p. e30.
- 334 13. Petrie, M. and G. Roberts, *Sexual selection and the evolution of evolvability*.  
335 Heredity, 2007. **98**(4): p. 198-205.
- 336 14. Dugand, R.J., W.J. Kennington, and J.L. Tomkins, *Evolutionary divergence in*  
337 *competitive mating success through female mating bias for good genes*. Science  
338 Advances, 2018. **4**(5): p. eaaq0369.
- 339 15. Petrie, M., *Improved growth and survival of offspring of peacocks with more*  
340 *elaborate trains*. Nature, 1994. **371**(6498): p. 598-599.
- 341 16. Møller, A.P. and R.V. Alatalo, *Good-genes effects in sexual selection*. Proceedings of  
342 the Royal Society of London. Series B: Biological Sciences, 1999. **266**(1414): p. 85-  
343 91.
- 344 17. David, P., et al., *Condition-dependent signalling of genetic variation in stalk-eyed*  
345 *flies*. Nature, 2000. **406**(6792): p. 186-188.
- 346 18. Hale, M.L., et al., *Is the peacock's train an honest signal of genetic quality at the*  
347 *major histocompatibility complex?* Journal of Evolutionary Biology, 2009. **22**(6): p.  
348 1284-1294.
- 349 19. Kokko, H., et al., *The sexual selection continuum*. Proceedings of the Royal Society  
350 of London. Series B: Biological Sciences, 2002. **269**(1498): p. 1331-1340.
- 351 20. Kotiaho, J.S., et al., *On the resolution of the lek paradox*. Trends in Ecology &  
352 Evolution, 2008. **23**(1): p. 1-3.
- 353 21. Petrie, M. and B. Kempenaers, *Extra-pair paternity in birds: explaining variation*  
354 *between species and populations*. Trends in Ecology & Evolution, 1998. **13**(2): p. 52-  
355 58.
- 356 22. Møller, A.P. and J.J. Cuervo, *Minisatellite mutation rates increase with extra-pair*  
357 *paternity among birds*. BMC Evolutionary Biology, 2009. **9**(1): p. 100.

- 358 23. Anmarkrud, J.A., et al., *Factors affecting germline mutations in a hypervariable*  
359 *microsatellite: A comparative analysis of six species of swallows (Aves:*  
360 *Hirundinidae)*. Mutation Research/Fundamental and Molecular Mechanisms of  
361 Mutagenesis, 2011. **708**(1): p. 37-43.
- 362 24. Ellegren, H., *Characteristics, causes and evolutionary consequences of male-biased*  
363 *mutation*. Proceedings of the Royal Society B: Biological Sciences, 2007. **274**(1606):  
364 p. 1-10.
- 365 25. Baur, J. and D. Berger, *Experimental evidence for effects of sexual selection on*  
366 *condition-dependent mutation rates*. Nature Ecology & Evolution, 2020.
- 367 26. Iglesias-Carrasco, M., et al., *Sexual selection, body mass and molecular evolution*  
368 *interact to predict diversification in birds*. Proceedings of the Royal Society B:  
369 Biological Sciences, 2019. **286**(1899): p. 20190172.
- 370 27. Earl, D.J. and M.W. Deem, *Evolvability is a selectable trait*. 2004.
- 371 28. Drake, J.W., et al., *Rates of Spontaneous Mutation*. Genetics, 1998. **148**(4): p. 1667.
- 372 29. Metzgar, D. and C. Wills, *Evidence for the Adaptive Evolution of Mutation Rates*.  
373 Cell, 2000. **101**(6): p. 581-584.
- 374 30. Janetos, A.C., *Strategies of female mate choice: A theoretical analysis*. Behavioral  
375 Ecology and Sociobiology, 1980. **7**(2): p. 107-112.
- 376 31. Johnstone, R.A. and D.J.D. Earn, *Imperfect female choice and male mating skew on*  
377 *leks of different sizes*. Behavioral Ecology and Sociobiology, 1999. **45**(3): p. 277-281.
- 378 32. Petrie, M., T. Halliday, and C. Sanders, *Peahens prefer peacocks with elaborate*  
379 *trains*. Animal Behaviour, 1991. **41**(2): p. 323-331.
- 380
